# Supplementary material for: Ru-based monolithic catalysts for the catalytic oxidation of chlorinated volatile organic compounds
Source: Royal Society of Chemistry journal article supplement (doi:10.1039/d2ra07823f), 2023-01-01
Supplement: d2ra07823f1.pdf [file d2ra07823f1.pdf]

# Support information for Ru-based monolithic catalysts for the catalytic oxidation of chlorinated volatile organic compounds

Yemin Zhao,<sup>a,b,d</sup> Chao Xi,<sup>b,d</sup> Shan Gao,<sup>\*b,d</sup> Yuejun Wang,<sup>b,d</sup> Haiqiang Wang,<sup>a,d</sup> Pengfei Sun<sup>c</sup> and Zhongbiao Wu<sup>a,d</sup>

<sup>a</sup>Department of Environmental Engineering, Zhejiang University, Hangzhou 310058, P. R. China.

<sup>b</sup>Zhejiang Tianlan Environmental Protection Technology Co., Ltd., Hangzhou 311202, China. E-mail: gaoshan@tianlan.cn

<sup>c</sup>Department of Chemistry, Key Laboratory of Surface & Interface Science of Polymer Materials of Zhejiang Province, Zhejiang Sci-Tech University, Hangzhou 310018, China.

<sup>d</sup>Zhejiang Provincial Engineering Research Center of Industrial Boiler & Furnace Flue Gas Pollution Control, 866 Yuhangtang Road, Hangzhou 310058, P. R. China

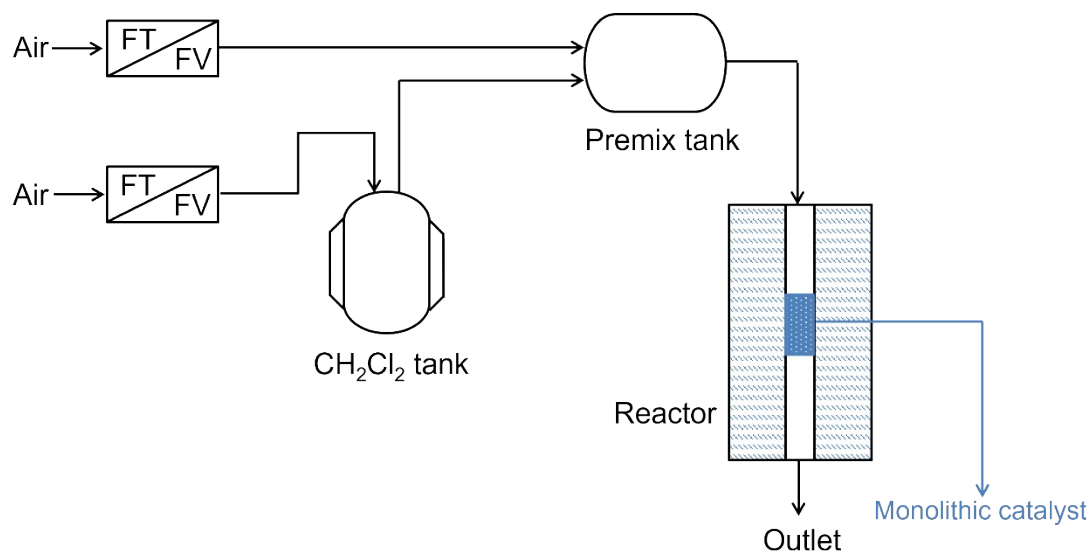

**Fig. S1.** The schematic diagram of the experimental set-up for DCM degradation

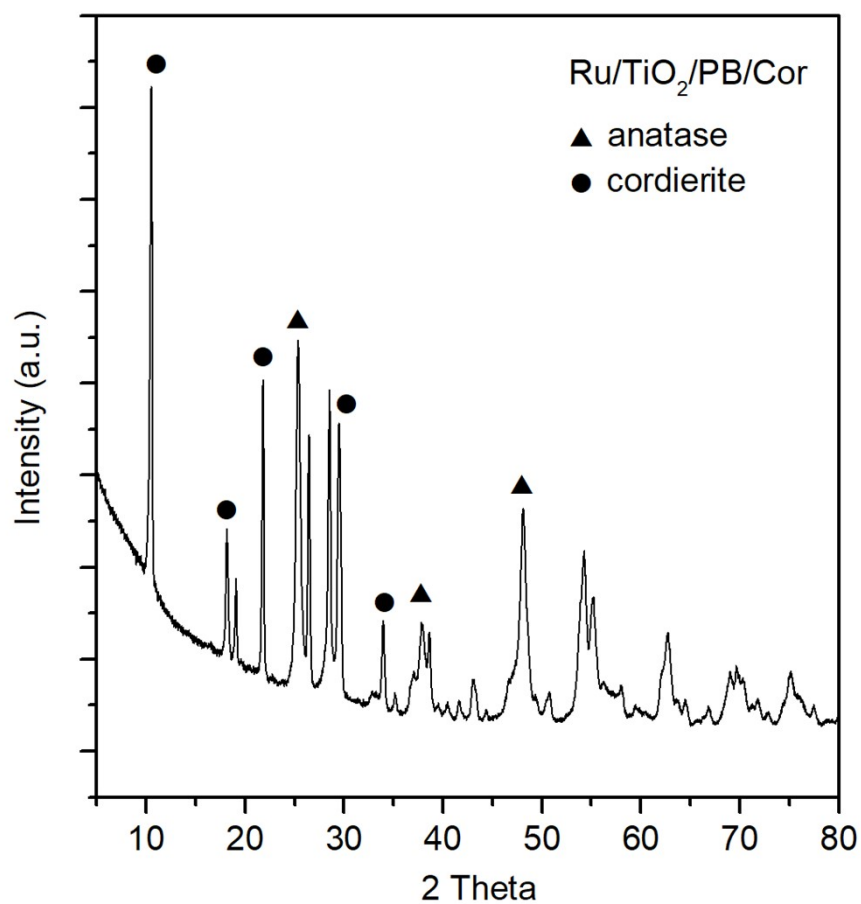

**Fig. S2.** The XRD pattern of Ru/TiO<sub>2</sub>/PB/Cor

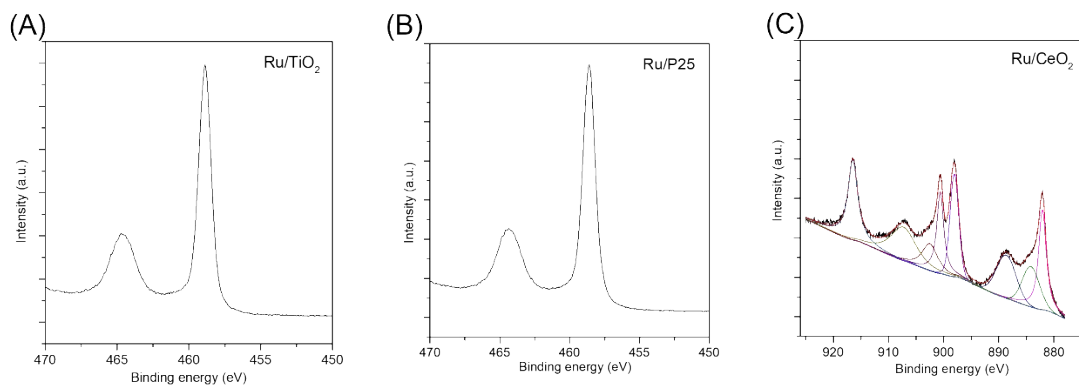

**Fig. S3.** (A) Ti 2p XPS spectra of Ru/TiO<sub>2</sub>; (B) Ti 2p XPS spectra of Ru/P25; (C) Ce 3d XPS spectra of Ru/CeO<sub>2</sub>;

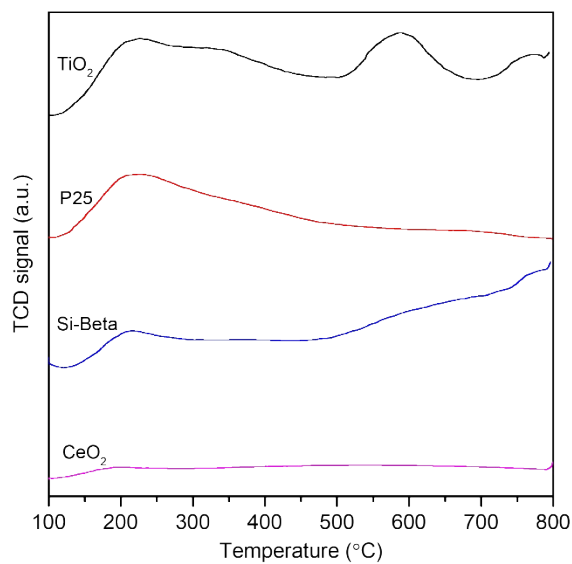

**Fig. S4.** The NH<sub>3</sub>-TPD profiles of TiO<sub>2</sub>, P25, Si-Beta and CeO<sub>2</sub>.

**Table S1.** The carbon balance over various catalysts at 460 °C

| Catalysts                   | ratio <sup>[a]</sup> |
|-----------------------------|----------------------|
| Ru/TiO <sub>2</sub> /Cor    | 100.84%              |
| Ru/P25/Cor                  | 93.26%               |
| Ru/Si-Beta/Cor              | 91.08%               |
| Ru/CeO <sub>2</sub> /Cor    | 91.43%               |
| TiO <sub>2</sub> /Cor       | 26.15%               |
| Ru/TiO <sub>2</sub> /PB/Cor | 93.50%               |
| Ru/P25/PB/Cor               | 102.42%              |
| Ru/Si-Beta/PB/Cor           | 97.37%               |
| Ru/CeO <sub>2</sub> /PB/Cor | 102.48%              |

$$[a]: \text{Ratio (\%)} = \frac{[CH_2Cl_2]_{out} + [CO_2]_{out} + [CO]_{out}}{[CH_2Cl_2]_{in}} \times 100\%$$
